# Supplementary material for: Effect of Vipera ammodytes ammodytes Snake Venom on the Human Cytokine Network
Source: PubMed Central journal article supplement (PMC6070926; doi:10.3390/toxins10070259), 2018-06-25
Supplement: toxins-10-00259-s001.pdf [file toxins-10-00259-s001.pdf]

## Supplementary Materials: Effect of *Vipera ammodytes ammodytes* Snake Venom on the Human Cytokine Network

Francisc Boda, Krisztina Banfai, Kitti Garai, Augustin Curticepean, Lavinia Berta, Emese Sipos and Krisztian Kvell

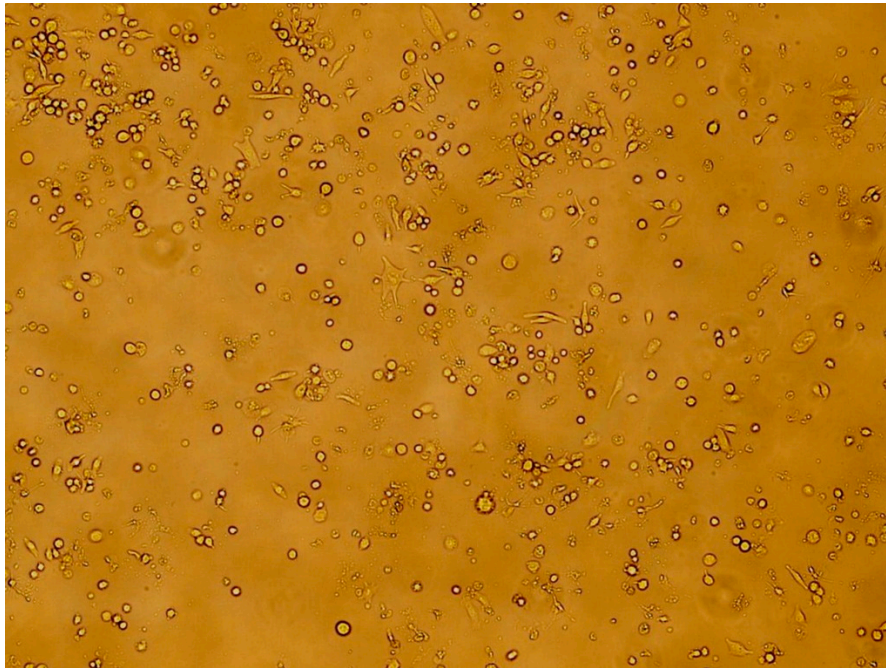

**Figure S1.** Monocyte cells treated with 1.0 µg/mL *VaaV* solution showing differentiation towards macrophage lineage as suggested by adherent polygonal cellular shape and growth arrest.

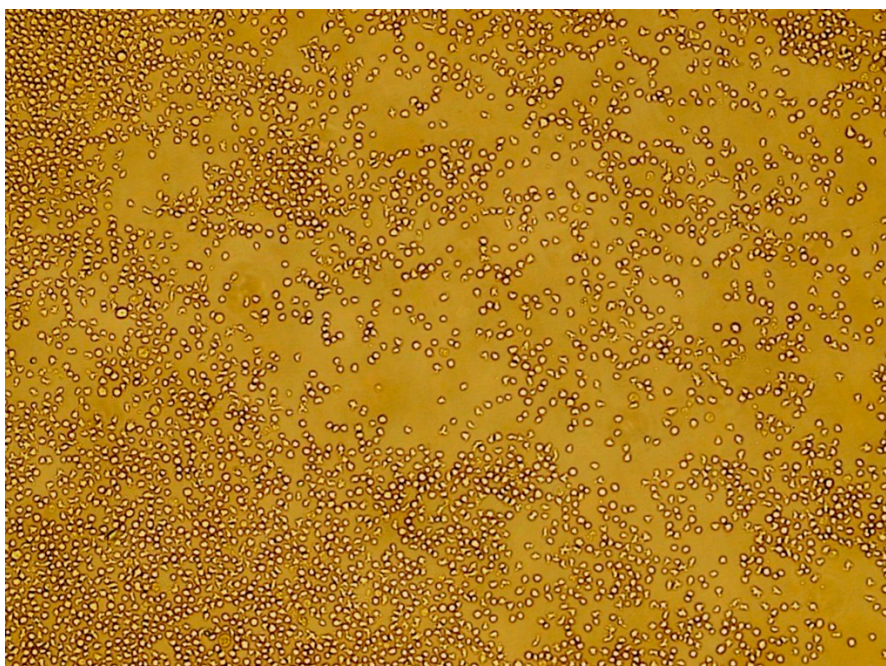

**Figure S2.** Viable monocytes, lacking signs of differentiation following incubation without treatment, serving as negative control.

**Table S1.** Relative quantification (RQ) values measured following treatment of U937 cells with 1.0 µg/mL *VaaV*. All assays were plated in triplicate. Untreated cells served as reference (negative control). Mean RQ, standard error, and 90% confidence interval (using t-distribution for small set of samples) were calculated if at least two values were measured.

| Target name               | Sample<br>(1 µg/mL <i>VaaV</i> ) |         |       |                |
|---------------------------|----------------------------------|---------|-------|----------------|
|                           | Measured RQ (n=3)                | Mean RQ | SE    | CI (90%)       |
| <i>18S</i> <sup>1</sup>   | ND                               |         |       |                |
|                           | ND                               | NI      | NI    | NI             |
|                           | ND                               |         |       |                |
| <i>GAPDH</i> <sup>1</sup> | ND                               |         |       |                |
|                           | ND                               | NI      | NI    | NI             |
|                           | ND                               |         |       |                |
| <i>HPRT1</i> <sup>1</sup> | ND                               |         |       |                |
|                           | ND                               | NI      | NI    | NI             |
|                           | ND                               |         |       |                |
| <i>GUSB</i> <sup>1</sup>  | ND                               |         |       |                |
|                           | ND                               | NI      | NI    | NI             |
|                           | ND                               |         |       |                |
| <i>IFNA1</i>              | ND                               |         |       |                |
|                           | ND                               | NI      | NI    | NI             |
|                           | ND                               |         |       |                |
| <i>IFNA16</i>             | ND                               |         |       |                |
|                           | ND                               | NI      | NI    | NI             |
|                           | ND                               |         |       |                |
| <i>IFNA17</i>             | ND                               |         |       |                |
|                           | ND                               | NI      | NI    | NI             |
|                           | ND                               |         |       |                |
| <i>IFNA2</i>              | 2.525                            |         |       |                |
|                           | ND                               | 6.572   | 4.048 | 6.572 ± 25,556 |
|                           | 10.620                           |         |       |                |
| <i>IFNA6</i>              | ND                               |         |       |                |
|                           | ND                               | NI      | NI    | NI             |
|                           | ND                               |         |       |                |
| <i>IFNA7</i>              | 5.964                            |         |       |                |
|                           | ND                               | NI      | NI    | NI             |
|                           | ND                               |         |       |                |
| <i>IFNA8</i>              | 1.914                            |         |       |                |
|                           | ND                               | NI      | NI    | NI             |
|                           | 0.665                            |         |       |                |
| <i>IFNB1</i>              | 2.788                            |         |       |                |
|                           | 3.654                            | 2.700   | 0.578 | 2.700 ± 1,686  |
|                           | 1.658                            |         |       |                |
| <i>IFNG</i>               | ND                               |         |       |                |
|                           | ND                               | NI      | NI    | NI             |
|                           | ND                               |         |       |                |
| <i>IL10</i>               | 5.841                            |         |       |                |
|                           | 4.700                            | 5.321   | 0.333 | 5.321 ± 0,972  |

|              |       |       |       |               |
|--------------|-------|-------|-------|---------------|
|              | 5.422 |       |       |               |
|              | 0.454 |       |       |               |
| <i>IL12A</i> | 0.572 | 0.513 | 0.059 | 0.513 ± 0,374 |
|              | ND    |       |       |               |
|              | 0.886 |       |       |               |
| <i>IL12B</i> | 0.001 | 0.444 | 0.443 | 0.444 ± 2,794 |
|              | ND    |       |       |               |
|              | ND    |       |       |               |
| <i>IL13</i>  | ND    | NI    | NI    | NI            |
|              | ND    |       |       |               |
|              | ND    |       |       |               |
| <i>IL15</i>  | ND    | NI    | NI    | NI            |
|              | ND    |       |       |               |
|              | 1.435 |       |       |               |
| <i>IL16</i>  | 1.490 | 1.436 | 0.031 | 1.436 ± 0.089 |
|              | 1.384 |       |       |               |
|              | ND    |       |       |               |
| <i>IL17A</i> | ND    | NI    | NI    | NI            |
|              | ND    |       |       |               |
|              | 0.569 |       |       |               |
| <i>IL18</i>  | 0.575 | 0.561 | 0.011 | 0.561 ± 0,033 |
|              | 0.538 |       |       |               |
|              | 6.062 |       |       |               |
| <i>IL1A</i>  | 5.094 | 4.672 | 1.642 | 4.672 ± 2,767 |
|              | 2.861 |       |       |               |
|              | 7.134 |       |       |               |
| <i>IL1B</i>  | 6.859 | 7.213 | 0.231 | 7.213 ± 0,673 |
|              | 7.646 |       |       |               |
|              | ND    |       |       |               |
| <i>IL2</i>   | ND    | NI    | NI    | NI            |
|              | ND    |       |       |               |
|              | ND    |       |       |               |
| <i>IL3</i>   | ND    | NI    | NI    | NI            |
|              | ND    |       |       |               |
|              | ND    |       |       |               |
| <i>IL4</i>   | ND    | NI    | NI    | NI            |
|              | ND    |       |       |               |
|              | 9.880 |       |       |               |
| <i>IL5</i>   | ND    | NI    | NI    | NI            |
|              | ND    |       |       |               |
|              | 1.411 |       |       |               |
| <i>IL6</i>   | 0.457 | NI    | NI    | NI            |
|              | ND    |       |       |               |
|              | 7.540 |       |       |               |
| <i>IL8</i>   | 6.493 | 6.969 | 0.306 | 6.969 ± 0,893 |
|              | 6.875 |       |       |               |
| <i>IL9</i>   | ND    | NI    | NI    | NI            |

|            |       |       |       |               |
|------------|-------|-------|-------|---------------|
|            | ND    |       |       |               |
|            | ND    |       |       |               |
|            | 2.919 |       |       |               |
| <i>LTA</i> | ND    | NI    | NI    | NI            |
|            | ND    |       |       |               |
|            | 1.596 |       |       |               |
| <i>TNF</i> | 1.512 | 1.589 | 0.043 | 1.589 ± 0,124 |
|            | 1.659 |       |       |               |

---

<sup>1</sup> Endogenous control genes. ND: Not detectable. NI: Not interpretable. SE: Standard error; CI: Confidence interval; *GAPDH*: glyceraldehyde-3-Phosphate Dehydrogenase ; *HPRT1*: hypoxanthine phosphoribosyltransferase 1; *GUSB*: glucuronidase beta; *IFNA*: interferon alpha; *IFNB*: interferon beta; *IFNG*: interferon gamma; *IL*: interleukin; *LTA*: lymphotoxin alpha; *TNF*: tumor necrosis factor.
